# Supplementary material for: Controlled release and macrophage polarizing activity of cold-pressed rice bran oil in a niosome system
Source: Royal Society of Chemistry journal article supplement (doi:10.1039/c8fo01884g), 2019-01-01

**Supporting information Fig. 1.** Expression of M1 marker genes (IL-8, TNF- $\alpha$ , IL-1 $\beta$ , IL-12p40) (A) and M2 marker genes (MRC-1, CCL-18, DC-SIGN) (B) on M0 phenotype after stimulation with 25, 50 and 100  $\mu\text{g/ml}$  *in vitro* digested CRBO for 3 h. The bar graphs represent means  $\pm$  SD from two independent replications. Different letters indicate statistically different among treatments at confidence interval of 95%.

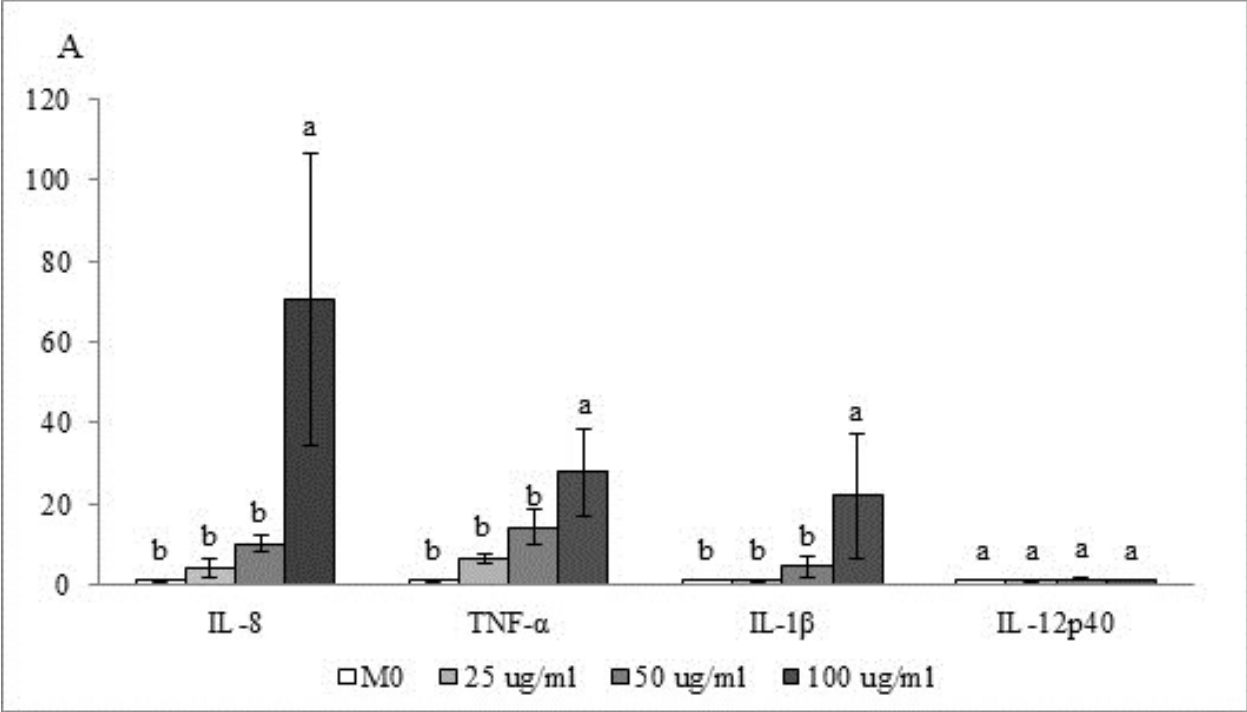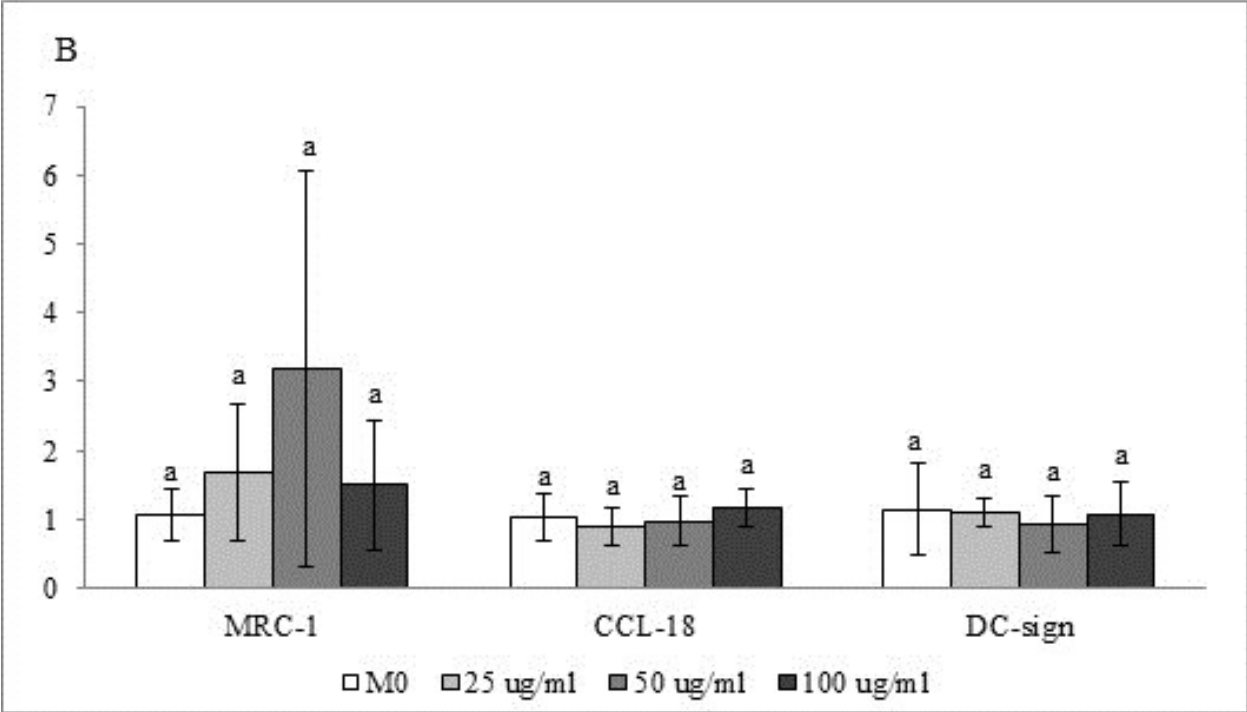

**Supporting information Fig. 2.** Expression of M1 marker genes (IL-8, TNF- $\alpha$ , IL-1 $\beta$ , IL-12p40) (A) and M2 marker genes (MRC-1, CCL-18, DC-SIGN) (B) on M1 phenotype after stimulation with 25, 50 and 100  $\mu\text{g/ml}$  *in vitro* digested CRBO for 3 h. The bar graphs represent means  $\pm$  SD from two independent replications. Different letters indicate statistically different among treatments at confidence interval of 95%.

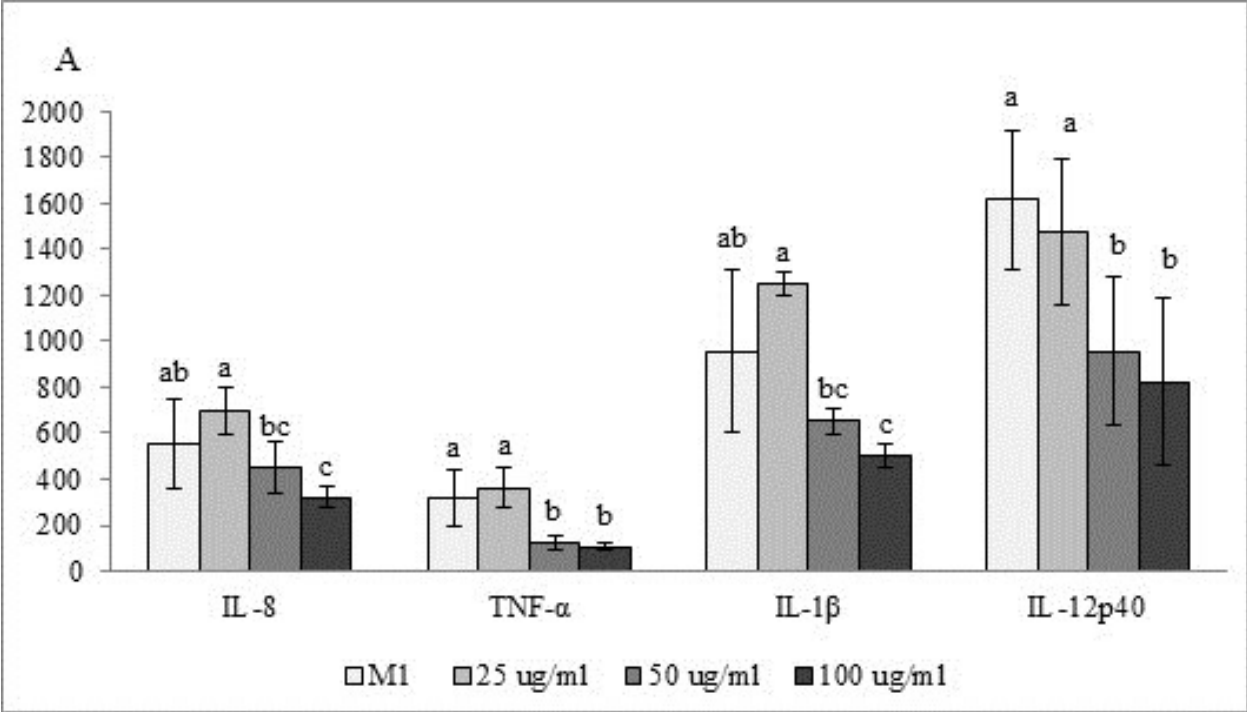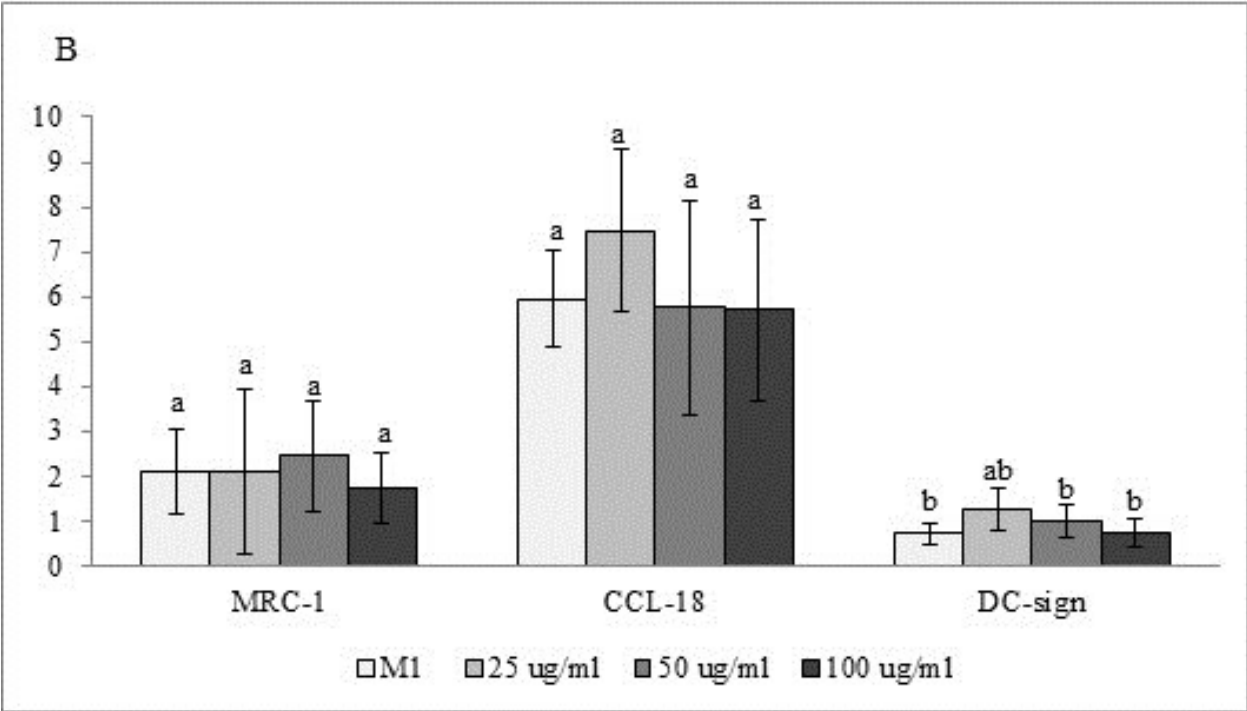

**Supporting information Fig. 3** Expression of M1 marker genes (IL-8, TNF- $\alpha$ , IL-1 $\beta$ , IL-12p40) (A) and M2 marker genes (MRC-1, CCL-18, DC-SIGN) (B) on M2 phenotype after stimulation with 25, 50 and 100  $\mu\text{g/ml}$  *in vitro* digested CRBO for 3 h. The bar graphs represent means  $\pm$  SD from two independent replications. Different letters indicate statistically different among treatments at confidence interval of 95%.

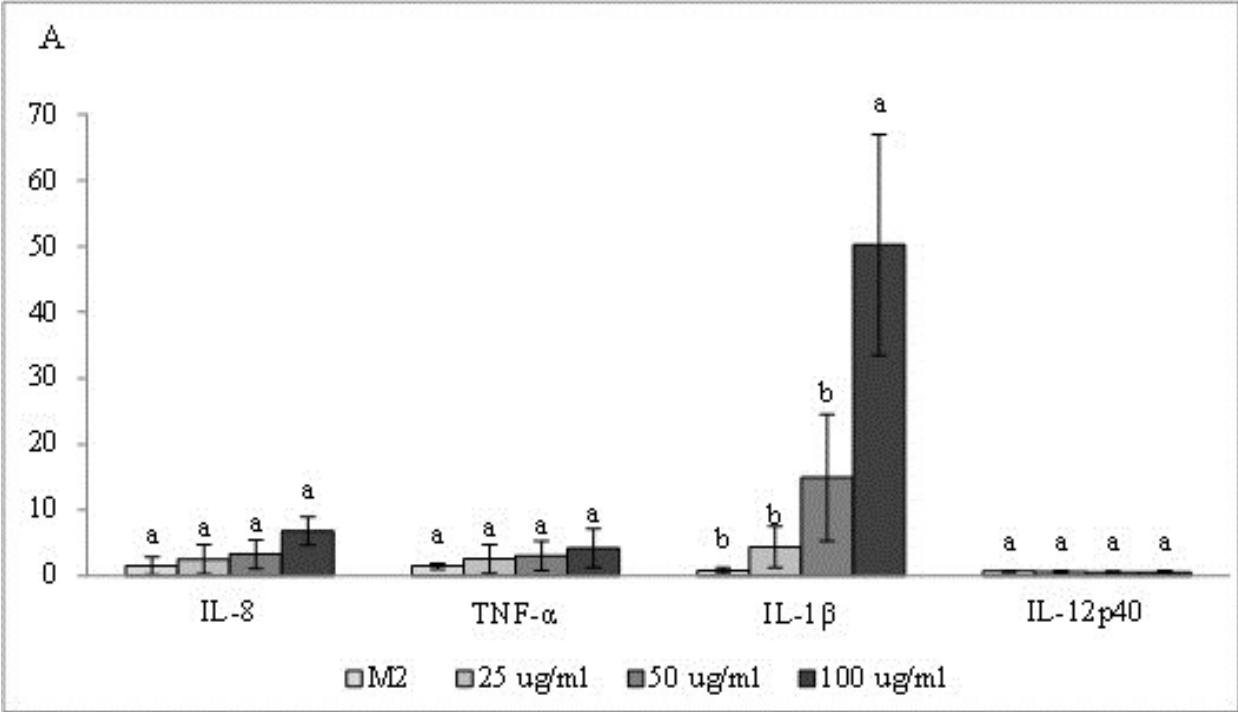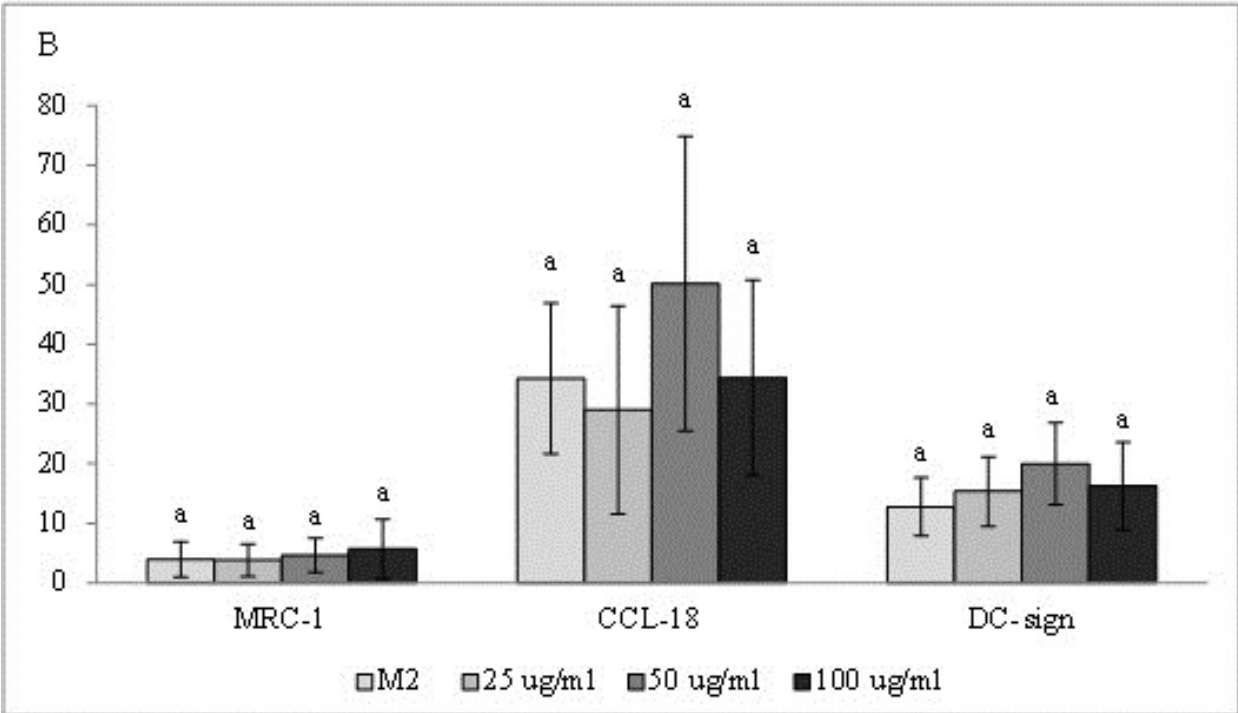

Supplement: c8fo01884g1.pdf [file c8fo01884g1.pdf]
